# Supplementary material
Source: publisher site journal article supplement (https://www.dovepress.com/article/611392)
Supplement: Supplementary file 1 [file 611392%20Revised%20%2509Supplementary%20tables.docx]

**Supplementary Table 1 Basic Characteristics Categorized by Pathology**

| **Items** | **Definition** | **Normal** | **CIN1** | **CIN2+** | **Undetected** | **Total** |
| --- | --- | --- | --- | --- | --- | --- |
| **Numbers** |  | 40 | 11 | 13 | 813 | 877 |
| **Age years, median [IQR]** |  | 40.5  [35.0–53.0] | 38.0  [31.7–48.7] | 42.0  [33.3–58.0] | 37.0  [31.0–44.0] | 37.0  [32.0–45.0] |
| **Age, n (%)** | ≤45 | 24 (60.0) | 7 (63.6) | 8 (61.5) | 627 (77.1) | 666 (75.9) |
| >45 | 16 (40.0) | 4 (36.4) | 5 (38.5) | 186 (22.9) | 211 (24.1) |
| **Cytology, n (%)** | NILM | 27 (67.5) | 2 (18.2) | 3 (23.1) | 762 (93.7) | 794 (90.5) |
| ASC-US | 8 (20.0) | 2 (18.2) | 2 (15.4) | 31 (3.8) | 43 (4.9) |
| LSIL | 4 (10.0) | 5 (45.5) | 3 (23.1) | 11 (1.4) | 23 (2.6) |
| ASC-H / AGC | 0 (0.0) | 1 (9.1) | 1 (7.7) | 4 (0.5) | 6 (0.7) |
| HSIL+ | 1 (2.5) | 1 (9.1) | 4 (30.8) | 5 (0.6) | 11 (1.3) |
| **hrHPV** | Negative | 12 (30.0) | 2 (18.2) | 2 (15.4) | 671 (82.5) | 687 (78.3) |
| Positive | 28 (70.0) | 9 (81.8) | 11 (84.6) | 142 (17.5) | 190 (21.7) |
| **HPV multiple infection, n (%)** | HPV (-) | 9 (22.5) | 0 (0.0) | 2 (15.4) | 629 (77.4) | 640 (73.0) |
| LR-HPV | 3 (7.5) | 2 (18.2) | 0 (0.0) | 42 (5.2) | 47 (5.4) |
| Single | 20 (50.0) | 8 (72.7) | 8 (61.5) | 127 (15.6) | 163 (18.6) |
| double | 8 (20.0) | 0 (0.0) | 3 (23.1) | 11 (1.4) | 22 (2.5) |
| Triple+ | 0 (0.0) | 1 (9.1) | 0 (0.0) | 4 (0.5) | 5 (0.6) |
| **DNA ploidy, n (%)** | Normal | 29 (72.5) | 3 (27.3) | 4 (30.8) | 731 (89.9) | 767 (87.5) |
| Abnormal | 11 (27.5) | 8 (28.6) | 9 (69.2) | 82 (10.1) | 110 (12.5) |
| **DS, n (%)** | DS (-) | 27 (67.5) | 5 (45.5) | 6 (46.2) | 753 (92.6) | 791 (90.2) |
| DS (+) | 13 (32.5) | 6 (54.5) | 7 (53.8) | 60 (7.4) | 86 (9.8) |

Abbreviations: CIN2+, includes CIN2, CIN3, and cervical cancer; n, numbers; IQR, Interquartile Range; CIN, cervical intraepithelial neoplasia; NILM, Negative for Intraepithelial Lesion or Malignancy; ASC-US, Atypical Squamous Cells of Undetermined Significance; LSIL, Low-Grade Squamous Intraepithelial Lesion; ASC-H, Atypical Squamous Cells - cannot exclude HSIL; AGC, Atypical Glandular Cells; HISL, High-Grade Squamous Intraepithelial Lesion; hrHPV, high-risk Human Papillomavirus; LR-HPV, low-risk HPV; DS, p16/Ki67 dual-staining cytology.

**Supplementary Table 2 Consistency analysis among two methods**

|  | **A (+), B (+)** | **A (+), B (-)** | **A (-), B (+)** | **A (-), B (-)** | **Positive rate of A %** | **Positive rate of B %** | **Difference % (95%CI)** | ***P*-value** | **Kappa (95%CI)** |
| --- | --- | --- | --- | --- | --- | --- | --- | --- | --- |
| **Cytology* (A) vs. DS (B) (all n = 877)** | | | | | | | | | |
| **n** | 27 | 13 | 59 | 778 | 4.6 | 9.8 | 5.3 (3.4–7.1） | < 0.001 | 0.39 (0.28–0.50） |
| **Cytology* (A) vs. DNA ploidy (B) (all n = 877)** | | | | | | | | | |
| **n** | 38 | 2 | 72 | 765 | 4.6 | 12.5 | 8.0 (6.1–9.8） | < 0.001 | 0.47 (0.37–0.57） |
| **Cytology* (A) vs. DS (B) (hrHPV (-) n = 687)** | | | | | | | | | |
| **n** | 3 | 0 | 42 | 642 | 0.4 | 6.6 | 6.1 (4.3–7.9） | < 0.001 | 0.12 (-0.00–0.24） |
| **Cytology* (A) vs. DNA ploidy (B) (hrHPV (-) n = 687)** | | | | | | | | | |
| **n** | 3 | 0 | 49 | 635 | 0.4 | 7.6 | 7.1 (5.2–9.1） | < 0.001 | 0.10 (-0.00–0.21） |
| **Cytology* (A) vs. DS (B) (hrHPV (+) n = 190)** | | | | | | | | | |
| **n** | 24 | 13 | 17 | 136 | 19.5 | 21.6 | 2.1 (-3.5–7.8） | 0.585 | 0.52 (0.37–0.67) |
| **Cytology* (A) vs. DNA ploidy (B) (hrHPV (+) n = 190)** | | | | | | | | | |
| **n** | 35 | 2 | 23 | 130 | 19.5 | 30.5 | 11.1 (6.1–16.0） | < 0.001 | 0.66 (0.54–0.78） |

* Cytology ≥ LSIL is identified as positive （+）， otherwise it is identified as Negative (-).

CI, confidence interval; DS, p16/Ki67 dual staining; hrHPV, high risk Human Papillomavirus.

**Supplementary Table 3 Clinical performance for detecting cytology ≥ LSIL**

| **Test** | **AUC (95%CI)** | **Sensitivity % (n/N) 95%CI** | **Specificity % (n/N) 95%CI** | **PPV % (n/N) 95%CI** | **NPV % (n/N) 95%CI** |
| --- | --- | --- | --- | --- | --- |
| **For detecting cytology ≥ LSIL （n = 40） in all participants （n = 877）** | | | | | |
| **hrHPV** | 0.871  (0.847–0.893） | 92.5 （37/40） 79.6–98.4 | 81.7 （684/837） 78.9–84.3 | 19.5 （37/190） 17.0–22.3 | 99.6 （684/687） 98.7–99.9 |
| **DS** | 0.802  0.774–0.828） | 67.5 （27/40） 50.9–81.4 | 93.0 （778/837） 91.0–94.6 | 31.4 （27/86） 24.8–38.8 | 98.4 （778/791） 97.4–99.0 |
| **DNA ploidy** | 0.932  (0.913–0.948） | 95.0 （38/40） 83.1–99.4 | 91.4 （765/767） 89.3–93.2 | 34.5 （38/110） 29.5–40.0 | 99.7 (765/767) 99.0-99.9 |
| ***P a*** | < 0.001 | 0.001 | 0.223 | 0.434 | < 0.001 |
| ***P b*** | 0.038 | > 0.999 | < 0.001 | < 0.001 | 0.572 |
| **For detecting cytology ≥ LSIL （n = 3） in hrHPV (-) woman （n = 687）** | | | | | |
| **DS** | 0.969  (0.953–0.981） | 100.0 （3/3） 29.2–100.0 | 93.9 （642/684） 91.8–95.5 | 6.7 （3/45）  5.1–8.7 | 100.0 (642/642) 99.4-100.0 |
| **DNA ploidy** | 0.964  (0.947–0.977） | 100.0 （3/3） 29.2–100.0 | 92.8 （635/684） 90.6–94.7 | 5.8 （3/52）  4.5–7.4 | 100.0 （635/635） 99.4–100.0 |
| ***P a*** | 0.400 | > 0.999 | 0.470 | 0.652 | 0.988 |
| **For detecting cytology ≥ LSIL （n = 37） in hrHPV （+） woman （n = 190）** | | | | | |
| **DS** | 0.769  (0.702–0.827） | 64.9 （24/37） 47.5–79.8 | 88.9 （136/153） 82.8–93.4 | 58.5 （24/41） 45.9–70.1 | 91.3 （136/149） 87.1–94.2 |
| **DNA ploidy** | 0.898 (0.846–0.937） | 94.6 （35/37） 81.8–99.3 | 85.0 （130/153） 78.3–90.2 | 60.3 （35/58） 50.9–69.1 | 98.5 （130/132） 94.4–99.6 |
| ***P a*** | 0.002 | 0.001 | 0.345 | 0.797 | < 0.001 |

*P a*, DNA ploid vs DS; *P b*, DNA ploid vs hrHPV

Abbreviations: LSIL, Low-Grade Squamous Intraepithelial Lesion; hrHPV, high-risk Human Papillomavirus; DS, p16/Ki67 dual-staining cytology; ASC-US, Atypical Squamous Cells of Undetermined Significance; AUC, Area Under the receiver operator characteristic Curve; CI, confidence interval; PPV, Positive Predictive Value; NPV, Negative Predictive Value.

**Supplementary Table 4 Clinical performance of DS/DNA ploidy in different subgroups**

| **Test** | **AUC (95%CI)** | **Sensitivity % (n/N) 95%CI** | **Specificity % (n/N) 95%CI** | **PPV % (n/N) 95%CI** | **NPV % (n/N) 95%CI** |
| --- | --- | --- | --- | --- | --- |
| **For detecting cytology ≥ ASC-US （n = 83） in all participants （n = 877）** | | | | | |
| **DS/DNA ploidy** | 0.843 (0.818–0.867) | 79.5 (66/83) 69.2–87.6 | 89.2 (708/794) 86.8–91.2 | 43.4 (66/152) 37.9–49.1 | 97.7 (708/725) 96.4–98.5 |
| **For detecting cytology ≥ LSIL （n = 40） in all participants （n = 877）** | | | | | |
| **DS/DNA ploidy** | 0.907 (0.886–0.925) | 95.0 (38/40) 83.1–99.4 | 86.4 (723/837) 83.9–88.6 | 25.0 (38/152) 21.7–28.6 | 99.7 (723/725) 98.9–99.9 |
| **For detecting cytology ≥ ASC-US （n = 17） in hrHPV (-) woman （n = 687）** | | | | | |
| **DS/DNA ploidy** | 0.830 (0.800–0.857) | 76.5 (13/17) 50.1–93.2 | 89.6 (600/670) 87.0–91.8 | 15.7 (13/83) 11.6–20.8 | 99.3 (600/604) 98.4–99.7 |
| **For detecting cytology ≥ LSIL （n = 3） in hrHPV (-) woman （n = 687）** | | | | | |
| **DS/DNA ploidy** | 0.942 (0.921–0.958) | 100.0 (3/3) 29.4–100.0 | 88.3 (604/684) 85.6–90.6 | 3.6 (3/83) 3.0–4.4 | 100. 0(604/604) 99.4–100.0 |
| **For detecting cytology ≥ ASC-US （n = 66） in hrHPV （+） woman （n = 190）** | | | | | |
| **DS/DNA ploidy** | 0.837 (0.777–0.887) | 80.3 (53/66) 68.7–89.1 | 87.1 (108/124) 79.9–92.5 | 76.8 (53/69) 67.3–84.2 | 89.3 (108/121) 83.5–93.1 |
| **For detecting cytology ≥ LSIL （n = 37） in hrHPV （+） woman （n = 190）** | | | | | |
| **DS/DNA ploidy** | 0.862 (0.804–0.908) | 94.6 (35/37) 81.8–99.3 | 77.8 (119/153) 70.3–88.1 | 50.7 (35/69) 43.1–58.3 | 98.3 (119/121) 93.9–99.6 |

Abbreviations: DS, p16/Ki67 dual-staining cytology; AUC, Area Under the receiver operator characteristic Curve; CI, confidence interval; PPV, Positive Predictive Value; NPV, Negative Predictive Value; hrHPV, high-risk Human Papillomavirus; ASC-US, Atypical Squamous Cells of Undetermined Significance; LSIL, Low-Grade Squamous Intraepithelial Lesion.
